# Supplementary material for: Down and up conversion luminescence of the lead-free organic metal halide material: (C9H8NO)2SnCl6·2H2O
Source: Royal Society of Chemistry journal article supplement (doi:10.1039/d1cp01702k), 2021-01-01
Supplement: d1cp01702k1.pdf [file d1cp01702k1.pdf]

## Supplementary material for

### Down and Up Conversion Luminescence of the Lead-Free Organic Metal Halide Material: (C<sub>9</sub>H<sub>8</sub>NO)<sub>2</sub>SnCl<sub>6</sub>·2H<sub>2</sub>O

Lamia Saidi<sup>\*,†</sup>, Amira Samet<sup>†</sup>, Thameur Dammak<sup>†</sup>, Sebastien Pillet<sup>§</sup>, and Younes Abid<sup>\*,†</sup>

<sup>†</sup>Laboratoire de Physique Appliquée, Université de Sfax, BP 1171, 3018 Sfax, Tunisia

<sup>§</sup> Université de Lorraine, CNRS, CRM2, Nancy, 54506 Vandoeuvre-les-Nancy, France

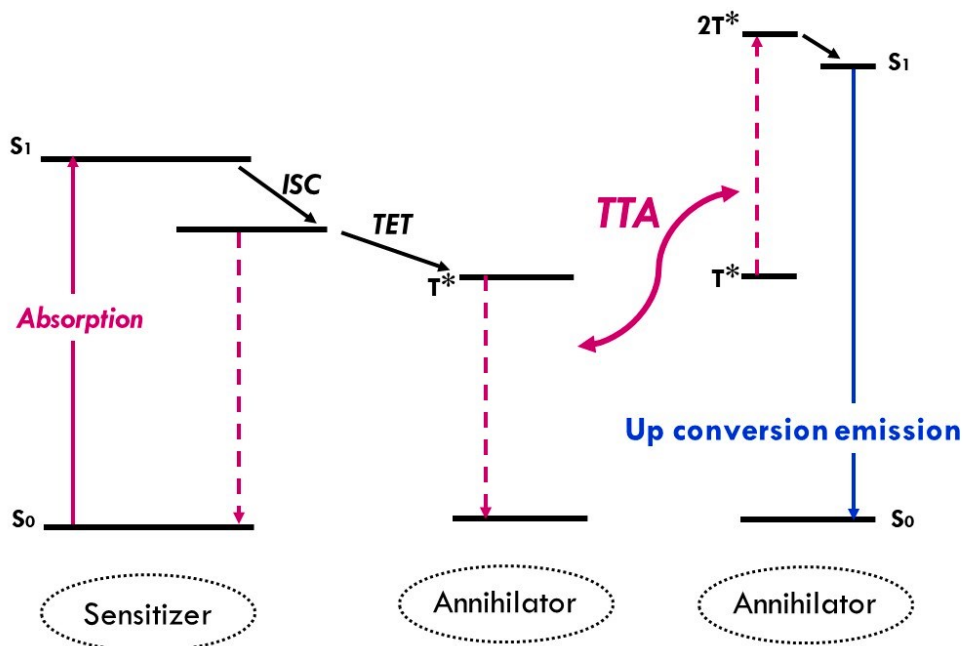

**Figure S1.** Schematic illustration of the triplet-triplet annihilation up conversion mechanism (TTA-UC). The triplet levels may occur with a sensitizer via intersystem crossing (ISC). It may also take place without a sensitizer via spin-orbit coupling (SOC) or via singlet-triplet fission (SF) within the annihilator.

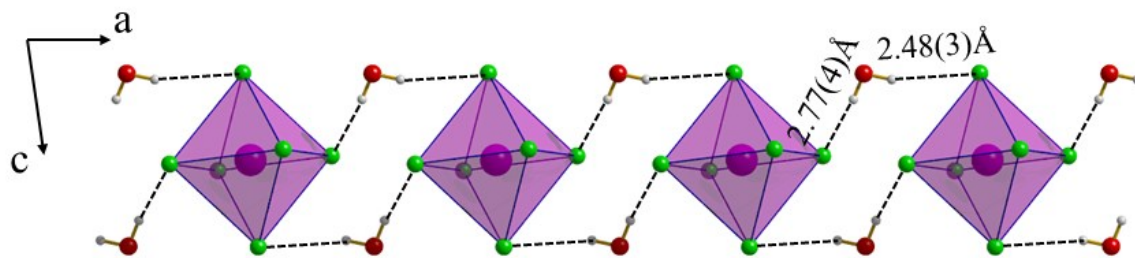

**Figure S2.** Packing of the  $\text{SnCl}_6$  octahedra along the crystallographic axis  $a$ , indicating the shortest  $\text{Cl}\cdots\text{H-O}$  hydrogen bonds through the lattice water molecules.

**Table S1.** Crystallographic data for  $[\text{HQ}]_2\text{SnCl}_6 \cdot 2\text{H}_2\text{O}$ .

|                                      |                                                                              |
|--------------------------------------|------------------------------------------------------------------------------|
| Chemical formula                     | $(\text{C}_9\text{H}_8\text{NO})_2\text{SnCl}_6 \cdot 2(\text{H}_2\text{O})$ |
| Formula weight/ $\text{g mol}^{-1}$  | 659.75                                                                       |
| Temperature (K)                      | 100                                                                          |
| Space group                          | P-1                                                                          |
| $a/\text{\AA}$                       | 7.2113(5)                                                                    |
| $b/\text{\AA}$                       | 9.5272(7)                                                                    |
| $c/\text{\AA}$                       | 9.5104(7)                                                                    |
| $\alpha/^\circ$                      | 83.192(2)                                                                    |
| $\beta/^\circ$                       | 79.981(2)                                                                    |
| $\gamma/^\circ$                      | 71.109(2)                                                                    |
| Volume/ $\text{\AA}^3$               | 607.42(8)                                                                    |
| $Z$                                  | 1                                                                            |
| $\Theta_{\text{max}}/^\circ$         | 33.249                                                                       |
| Collected reflections                | 15030                                                                        |
| Ref. independent [ $F^2 > 2s(F^2)$ ] | 4654 [4141]                                                                  |
| $\mu / \text{mm}^{-1}$               | 1.740                                                                        |

|                                                          |                 |
|----------------------------------------------------------|-----------------|
| Tmin / Tmax                                              | 0.677 / 0.746   |
| R <sub>int</sub>                                         | 0.0286          |
| <sup>a</sup> R1 [F <sup>2</sup> > 2*s(F <sup>2</sup> )]  | 0.0331 [0.0261] |
| <sup>a</sup> wR2 [F <sup>2</sup> > 2*s(F <sup>2</sup> )] | 0.0635 [0.0607] |
| <sup>b</sup> Goodness-of-fit on F <sup>2</sup>           | 0.991           |
| Largest diff. peak/hole / e <sup>-</sup> Å <sup>-3</sup> | 0.716 / -0.520  |

$$^a R_1 = \frac{\sum(F_o - F_c)/F_o}{\sum(F_o^2 - F_c^2)/\sum(F_o^2)} \text{ and } wR2 = \left\{ \frac{\sum[w(F_o^2 - F_c^2)^2]}{\sum[w(F_o^2)^2]} \right\}^{1/2}$$

$$^b G.O.F = \left[ \frac{\sum(w(F_o^2 - F_c^2))^2}{(Nobs - Nvar)} \right]^{1/2}$$

**Table S2.** Selected bond distances (Å) and bond angles (°).

|        |           |            |            |
|--------|-----------|------------|------------|
| Sn-C11 | 2.4372(4) | C6-C1      | 1.417(2)   |
| Sn-C12 | 2.4251(5) | C5-C7      | 1.415(3)   |
| Sn-C13 | 2.4294(4) | C7-C8      | 1.375(3)   |
| C1-O2  | 1.345(2)  | C8-C9      | 1.392(3)   |
| C1-C2  | 1.374(2)  | C9-N1      | 1.333(2)   |
| C2-C3  | 1.411(3)  | N1-C6      | 1.370(2)   |
| C3-C4  | 1.371(3)  | Cl1-Sn-Cl2 | 89.346(15) |
| C4-C5  | 1.421(3)  | Cl1-Sn-Cl3 | 90.327(14) |
| C5-C6  | 1.416(2)  | Cl2-Sn-Cl3 | 90.150(16) |

**Table S3.** Distortion parameters.

|                                   |        |
|-----------------------------------|--------|
| $\lambda_{octa}$                  | 0.9999 |
| $\sigma_{oct}^2$ (°) <sup>b</sup> | 0.2026 |

$\lambda_{oct} = \frac{1}{6} \sum_{i=1}^6 (d_i/d_0)^2$  is the quadratic octahedral elongation, where  $d_i$  are the six independent Sn–Cl bond lengths,  $d_0$  is the mean Sn–Cl bond length.  $\sigma_{oct}^2 = \frac{1}{11} \sum_{i=1}^{12} (\alpha_i - 90)^2$  is the octahedral angle variance, where  $\alpha_i$  are the Cl–Sn–Cl angles. [1,2]

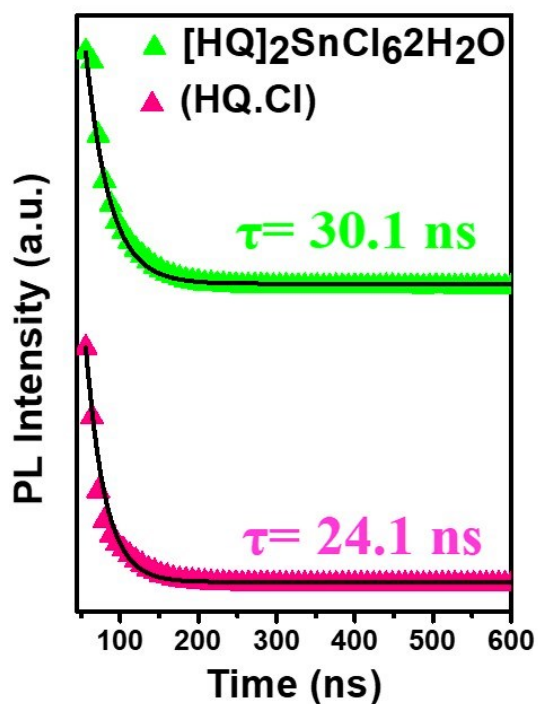

**Fig. S3** Time-Resolved PL lifetime of [HQ]<sub>2</sub>SnCl<sub>6</sub>·2H<sub>2</sub>O and (HQ.Cl) salt under 375 nm excitation.

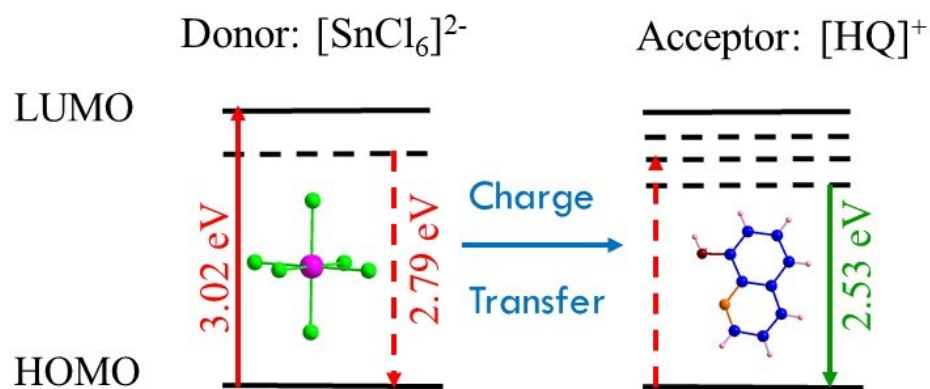

**Fig. S4** Energy diagram of  $[\text{HQ}]_2\text{SnCl}_6 \cdot 2\text{H}_2\text{O}$  electronic structure. The HOMO and LUMO levels for  $[\text{SnCl}_6]^{2-}$  dianions and  $[\text{HQ}]^+$  cations are included. Red dashed arrows correspond to non-radiative transitions illustrating the conversion of inorganic excitation to organic one.

## References

- [1] D Cortecchia, S Neutzner, ARS Kandada, E Mosconi, D Meggiolaro, F De Angelis, C Soci and A Petrozza; *J. Am. Chem. Soc.* (2017), **139**, 39–42.
- [2] K. Robinson, G. V. Gibbs, P. H. Ribbe, *Science* (1971), **172**, 567.
